# Supplementary material for: Surface modification of hydroxyapatite crystals by Mg–Al–CO3-layered double hydroxides in HA/Mg–Al–CO3–LDH nanocomposite
Source: Royal Society of Chemistry journal article supplement (doi:10.1039/c5nj00664c), 2015-01-01
Supplement: c5nj00664c1.pdf [file c5nj00664c1.pdf]

## Electronic supplementary Information

### Surface modification of hydroxyapatite crystals by Mg-Al-CO<sub>3</sub>-layered double hydroxides in HA/Mg-Al-CO<sub>3</sub>-LDH nanocomposite

Zolfaghar Rezvani\* and Masoumeh Akbari

*Department of Chemistry, Faculty of Basic Sciences, Azarbaijan Shahid Madani University, Tabriz, Iran*

**Table S1.** Ca and P content of the HA/Mg-AL-CO<sub>3</sub>-LDH nanocomposite after immersion in SBF.

| Immersion time(Day) | %Ca  | %P   | [Ca]/[P] |
|---------------------|------|------|----------|
| 0 (Initial sample)  | 29.3 | 13.4 | 1.69     |
| 1                   | 30.9 | 14.0 | 1.71     |
| 4                   | 33.9 | 15.0 | 1.75     |
| 7                   | 36.6 | 16.1 | 1.75     |

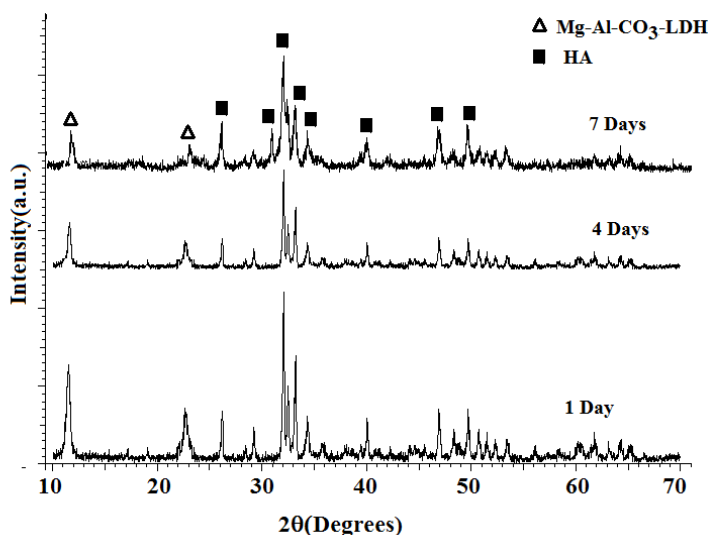

**Fig. S1.** X-ray diffraction patterns of HA/Mg-Al-CO<sub>3</sub>-LDH nanocomposite after immersion in SBF for 1, 4, and 7 days.

As can be seen from Fig.S1, the relative intensity of HA/LDH peaks increased with increasing of immersion time from 1 day to 7 days. This results confirm that the HA crystals are formed on the surface of HA/Mg-Al-CO<sub>3</sub>-LDH nanocomposite after immersion in SBF.
